# Supplementary material
Source: PubMed Central journal article supplement (PMC5921836)
Supplement: NIHMS951311-supplement-S1.pdf [file NIHMS951311-supplement-S1.pdf]

## **SUPPORTING INFORMATION**

### **Mutagenic atmospheres resulting from the photooxidation of aromatic hydrocarbon and NO<sub>x</sub> mixtures**

Theran P. Riedel<sup>a</sup>, David M. DeMarini<sup>b</sup>, Jose Zavala<sup>c</sup>, Sarah H. Warren<sup>b</sup>, Eric W. Corse<sup>d</sup>, John H. Offenberg<sup>a</sup>, Tadeusz E. Kleindienst<sup>a</sup>, Michael Lewandowski<sup>a</sup>

<sup>a</sup>National Exposure Research Laboratory, United States Environmental Protection Agency, Research Triangle Park, North Carolina, United States

<sup>b</sup>National Health and Environmental Effects Research Laboratory, United States Environmental Protection Agency, Research Triangle Park, North Carolina, United States

<sup>c</sup>Oak Ridge Institute for Science and Education, National Health and Environmental Effects Research Laboratory, United States Environmental Protection Agency, Research Triangle Park, North Carolina, United States

<sup>d</sup>Jacobs Technology, Cary, North Carolina, United States

No. of pages: 15

No. of tables: 6

No. of figures: 7

**Table S1. Additional Experiment Data**

| Precursor VOC    | Total SOA<br>( $\mu\text{g m}^{-3}$ ) | Particle OC<br>( $\mu\text{gC m}^{-3}$ ) | $\Delta\text{HC}^{\text{a}}$<br>(ppmC) | $\Delta\text{HC}$<br>( $\mu\text{gC m}^{-3}$ ) | Gas-Phase OC <sup>b</sup><br>( $\mu\text{C m}^{-3}$ ) | SOA Mass Yield | $\Delta\text{H}_{\text{eff}}^{\text{c}}$<br>( $\text{kJ mol}^{-1}$ ) | Exp No. <sup>d</sup> |
|------------------|---------------------------------------|------------------------------------------|----------------------------------------|------------------------------------------------|-------------------------------------------------------|----------------|----------------------------------------------------------------------|----------------------|
| benzene          | 191.8                                 | 78.4                                     | 2.14                                   | 1043                                           | 965                                                   | 0.172          | -9.5                                                                 | 763                  |
| toluene          | 165.8                                 | 74.5                                     | 2.53                                   | 1233                                           | 1159                                                  | 0.122          | -8.5                                                                 | 756                  |
| ethylbenzene     | 131.2                                 | 64.7                                     | 2.05                                   | 999                                            | 935                                                   | 0.123          | -14.6                                                                | 754                  |
| o-xylene         | 224.0                                 | 119.2                                    | 3.39                                   | 1652                                           | 1533                                                  | 0.127          | -22.1                                                                | 750                  |
| m-xylene         | 105.3                                 | 57.8                                     | 3.23                                   | 1574                                           | 1517                                                  | 0.060          | -29.8                                                                | 751                  |
| p-xylene         | 70.0                                  | 37.5                                     | 3.31                                   | 1613                                           | 1576                                                  | 0.038          | -20.5                                                                | 757                  |
| 1,2,4-TMB        | 82.1                                  | 51.8                                     | 3.13                                   | 1526                                           | 1474                                                  | 0.048          | -31.3                                                                | 753                  |
| 1,3,5-TMB        | 108.6                                 | 72.9                                     | 3.00                                   | 1462                                           | 1390                                                  | 0.071          | -41.9                                                                | 752                  |
| m-cresol         | 90.0                                  | 60.4                                     | 0.64                                   | 312                                            | 252                                                   | 0.297          | -13.3                                                                | 749                  |
| naphthalene      | 95.8                                  | 60.6                                     | 0.92                                   | 448                                            | 388                                                   | 0.296          | -13.6                                                                | 767                  |
| ethylbenzene-3.5 | 31.9                                  | 15.1                                     | 0.81                                   | 395                                            | 380                                                   | 0.072          | N/A                                                                  | 759                  |
| ethylbenzene-5   | 37.2                                  | 14.1                                     | 1.12                                   | 546                                            | 532                                                   | 0.062          | N/A                                                                  | 762                  |
| ethylbenzene-7   | 61.5                                  | 24.6                                     | 1.56                                   | 760                                            | 736                                                   | 0.076          | N/A                                                                  | 761                  |
| ethylbenzene-9   | 108.9                                 | 44.4                                     | 1.76                                   | 858                                            | 814                                                   | 0.111          | N/A                                                                  | 760                  |

<sup>a</sup> $\Delta\text{HC}$  is the difference between Lights OFF and Lights ON Precursor VOC mixing ratios from Table 1.

<sup>b</sup>Gas-Phase OC is the difference between  $\Delta\text{HC}$  and Particle OC not including any residual precursor VOC.

<sup>c</sup> $\Delta\text{H}_{\text{eff}}$  are the effective enthalpies of vaporization for the chamber-generated SOA. For more information, please consult: Offenberg, J. H.; Kleindienst, T. E.; Jaoui, M.; Lewandowski, M.; Edney, E. O., Thermal properties of secondary organic aerosols. *Geophysical Research Letters* **2006**, *33* (3).

<sup>d</sup>Experiment numbers are provided for internal reference.

**Table S2. Mutagenicity in *Salmonella* TA100-S9 with Lights On**

| Precursor VOC    | Exposure (h)              | rev plate <sup>-1a</sup> |               |               |
|------------------|---------------------------|--------------------------|---------------|---------------|
|                  |                           | Exp 1                    | Exp 2         | Exp 3         |
| benzene          | 0                         | 104, 93, 84              | 94, 92, 106   |               |
|                  | 1                         | 112, 139                 | 81, 111       |               |
|                  | 2                         | 93, 101                  | 83, 96        |               |
|                  | 4                         | 126, 88                  | 118, 101      |               |
|                  | 8                         | 138, 126                 | 126, 129      |               |
|                  | 16                        | 145, 167                 | 210, 184      |               |
|                  | sodium azide <sup>b</sup> |                          | 1110, 1145    | 1161, 1252    |
| toluene          | 0                         | 117, 123, 102            | 107, 98, 131  |               |
|                  | 1                         | 130, 130                 | 109, 111      |               |
|                  | 2                         | 122, 135                 | 123, 144      |               |
|                  | 4                         | 162, 135                 | 123, 158      |               |
|                  | 8                         | 195, 241                 | 187, 185      |               |
|                  | 16                        | 305, 306                 |               |               |
|                  | sodium azide <sup>b</sup> |                          | 1193, 1202    | 1292, 1180    |
| ethylbenzene     | 0                         | 121, 112, 119            | 120, 119, 146 |               |
|                  | 1                         | 137, 121                 | 113, 106      |               |
|                  | 2                         | 102, 125                 | 126, 159      |               |
|                  | 4                         | 155, 139                 | 149, 158      |               |
|                  | 8                         | 213, 171                 | 144, 171      |               |
|                  | 16                        | 253, 304                 | 305, 314      |               |
|                  | sodium azide <sup>b</sup> |                          | 1099, 1159    | 1186, 1153    |
| <i>o</i> -xylene | 0                         | 149, 137, 119            | 119, 126, 139 | 113, 113, 116 |
|                  | 1                         | 139, 134                 | 124, 138      |               |
|                  | 2                         | 133, 141                 | 127, 144      |               |
|                  | 4                         | 149, 165                 | 181, 193      |               |
|                  | 8                         | 251, 250                 | 263, 254      |               |
|                  | 16                        | 267, 296                 |               | 304, 272      |
|                  | sodium azide <sup>b</sup> |                          | 801, 809      | 888           |
| <i>m</i> -xylene | 0                         | 141, 120, 121            | 106, 105, 128 |               |
|                  | 1                         | 144, 159                 | 126, 121      |               |
|                  | 2                         | 118, 161                 | 121, 150      |               |
|                  | 4                         | 151, 168                 | 146, 144      |               |
|                  | 8                         | 218, 223                 | 180, 170      |               |
|                  | 16                        | 254, 272                 | 218, 215      |               |
|                  | sodium azide <sup>b</sup> |                          | 851, 853      | 880, 824      |
| <i>p</i> -xylene | 0                         | 127, 156, 147            | 162, 141, 133 |               |
|                  | 1                         | 165, 139                 | 178, 169      |               |
|                  | 2                         | 138, 153                 | 145, 162      |               |
|                  | 4                         | 154, 168                 | 133, 148      |               |
|                  | 8                         | 145, 149                 | 196, 193      |               |

|                           |    |                       |                       |
|---------------------------|----|-----------------------|-----------------------|
|                           | 16 | 192, 204              | 214, 179              |
| sodium azide <sup>b</sup> |    | 1184, 1182            | 1196, 1171            |
| 1,2,4-TMB                 | 0  | 118, 129, 124         | 147, 130, 126         |
|                           | 1  | 136, 142              | 150, 120              |
|                           | 2  | 146, 112              | 129, 169              |
|                           | 4  | 157, 144              | 165, 143              |
|                           | 8  | 180, 190              | 189, 187              |
|                           | 16 | 151, 149 <sup>c</sup> | 164, 147 <sup>c</sup> |
| sodium azide <sup>b</sup> |    | 599, 670              | 717, 703              |
| 1,3,5-TMB                 | 0  | 109, 139, 114         | 112, 118, 111         |
|                           | 1  | 138, 112              | 135, 132              |
|                           | 2  | 171, 141              | 156, 161              |
|                           | 4  | 176, 148              | 151, 173              |
|                           | 8  | 227, 224              | 192, 176              |
|                           | 16 | 203, 195 <sup>c</sup> | 215, 198 <sup>c</sup> |
| sodium azide <sup>b</sup> |    | 710, 762              | 692, 680              |
| <i>m</i> -cresol          | 0  | 100, 106, 101         | 116, 110, 117         |
|                           | 1  | 94, 111               | 105, 92               |
|                           | 2  | 111, 115              | 111, 115              |
|                           | 4  | 119, 114              | 120, 99               |
|                           | 8  | 89, 102               | 118, 101              |
| sodium azide <sup>b</sup> |    | 509, 463              | 474, 487              |
| naphthalene               | 0  | 84, 106, 115          | 92, 95, 119           |
|                           | 1  | 111, 100              | 83, 92                |
|                           | 2  | 97, 105               | 100, 89               |
|                           | 4  | 94, 88                | 97, 99                |
|                           | 8  | 87, 90                | 78, 89                |
|                           | 16 | 109, 100 <sup>c</sup> | 77, 83 <sup>c</sup>   |
| sodium azide <sup>b</sup> |    | 910, 889              | 834, 852              |
| clean air                 | 0  | 85, 88, 84            | 76, 80, 98            |
|                           | 1  | 69, 76                | 73, 95                |
|                           | 2  | 61, 94                | 95, 98                |
|                           | 4  | 75, 65                | 90, 100               |
|                           | 8  | 78, 59                | 78, 77                |
|                           | 16 | 54, 58 <sup>c</sup>   | 69, 62 <sup>c</sup>   |
| sodium azide <sup>b</sup> |    | 639, 692              | 744, 708              |

<sup>a</sup>Three plates were used for DMSO (0 h) controls, and two plates were used for all other exposures.

<sup>b</sup>Positive control at 3 µg/plate.

<sup>c</sup>Data not used in the linear regression because the  $r^2$  value was reduced by inclusion of those data.

**Table S3. Mutagenicity in *Salmonella* TA100-S9 with Lights Off**

| VOC combination                                           | Exposure (h) | rev plate <sup>-1 a</sup> |                     |
|-----------------------------------------------------------|--------------|---------------------------|---------------------|
|                                                           |              | Exp 1                     | Exp 2               |
| benzene + 1,2,4-TMB + <i>o</i> -xylene<br>(dark-1)        | 0            | 92, 95, 94                | 85, 72, 74          |
|                                                           | 1            | 79, 93                    | 77, 79              |
|                                                           | 2            | 97, 95                    | 80, 84              |
|                                                           | 4            | 83, 86                    | 80, 73              |
|                                                           | 8            | 78, 78                    | 77, 86              |
|                                                           | 16           | 54, 47 <sup>c</sup>       | 24, 29 <sup>c</sup> |
| sodium azide <sup>b</sup>                                 |              | 712, 780                  | 515, 511            |
| toluene + <i>m</i> -cresol + <i>m</i> -xylene<br>(dark-2) | 0            | 103, 101, 91              | 70, 85, 72          |
|                                                           | 1            | 103, 102                  | 74, 62              |
|                                                           | 2            | 96, 115                   | 65, 87              |
|                                                           | 4            | 90, 72                    | 65, 55              |
|                                                           | 8            | 72, 81                    | 40, 60              |
|                                                           | 16           | 63, 54 <sup>c</sup>       | 26, 20 <sup>c</sup> |
| sodium azide <sup>b</sup>                                 |              | 720, 745                  | 200, 309            |
| ethylbenzene + 1,3,5-TMB + <i>p</i> -xylene<br>(dark-3)   | 0            | 70, 105, 109              | 96, 86, 97          |
|                                                           | 1            | 86, 105                   | 97, 104             |
|                                                           | 2            | 104, 83                   | 99, 97              |
|                                                           | 4            | 81, 84                    | 92, 95              |
|                                                           | 8            | 101, 111                  | 99, 93              |
|                                                           | 16           | 67, 71 <sup>c</sup>       | 61, 69 <sup>c</sup> |
| sodium azide <sup>b</sup>                                 |              | 672, 697                  | 783, 788            |
| benzene + naphthalene<br>(dark-4)                         | 0            | 84, 79, 91                | 84, 88, 96          |
|                                                           | 1            | 96, 111                   | 95, 73              |
|                                                           | 2            | 104, 100                  | 105, 78             |
|                                                           | 4            | 79, 87                    | 87, 89              |
|                                                           | 8            | 75, 76                    | 77, 80              |
|                                                           | 16           | 61, 50 <sup>c</sup>       | 51, 54 <sup>c</sup> |
| sodium azide <sup>b</sup>                                 |              | 861, 858                  | 728, 761            |
| 1,2,4-TMB + <i>o</i> -xylene<br>(dark-5)                  | 0            | 88, 104, 102              | 89, 91, 101         |
|                                                           | 1            | 99, 91                    | 98, 120             |
|                                                           | 2            | 87, 85                    | 104, 113            |
|                                                           | 4            | 103, 101                  | 112, 105            |
|                                                           | 8            | 83, 95                    | 96, 111             |
|                                                           | 16           | 54, 72 <sup>c</sup>       | 74, 78 <sup>c</sup> |
| sodium azide <sup>b</sup>                                 |              | 868, 818                  | 748, 797            |

<sup>a</sup>Three plates were used for DMSO (0 h) controls, and two plates were used for all other exposures.

<sup>b</sup>Positive control at 3 µg/plate.

<sup>c</sup>Data not used in the linear regression because the  $r^2$  value was reduced by inclusion of those data.

**Table S4. P-Values of Correlations between Mutagenic Potencies of Each Experiment<sup>a</sup>**

|                  | benzene       | toluene       | ethylbenzene | <i>o</i> -xylene | <i>m</i> -xylene | <i>p</i> -xylene | 1,2,4-TMB |
|------------------|---------------|---------------|--------------|------------------|------------------|------------------|-----------|
| toluene          | <0.0001       |               |              |                  |                  |                  |           |
| ethylbenzene     | <0.0001       | <b>0.3442</b> |              |                  |                  |                  |           |
| <i>o</i> -xylene | <0.0176       | 0.0002        | <0.0001      |                  |                  |                  |           |
| <i>m</i> -xylene | <b>0.7157</b> | <0.0001       | <0.0001      | 0.0033           |                  |                  |           |
| <i>p</i> -xylene | <0.0001       | <0.0001       | <0.0001      | <0.0001          | <0.0001          |                  |           |
| 1,2,4-TMB        | <b>0.6671</b> | <0.0001       | <0.0001      | 0.0068           | <b>0.9069</b>    | 0.0006           |           |
| 1,3,5-TMB        | 0.0208        | 0.0122        | 0.0039       | <b>0.6086</b>    | 0.0064           | <0.0001          | 0.0118    |

<sup>a</sup>Correlations (Pearson's *r*) were the square root of the *r*<sup>2</sup> values determined by pair-wise comparisons of the mutagenic potencies of the atmospheres using the potency values from Table 1 expressed as rev m<sup>3</sup> mgC<sup>-1</sup> h<sup>-1</sup>. Values in **bold** are >0.05, indicating no significant difference between the mutagenic potencies of those two atmospheres with *P* < 0.05.

**Table S5. Summary of Results for the Ethylbenzene Variable Residence Time Experiments**

| Precursor VOC    | Lights OFF |           | Lights ON  |           |                        |                       | Mutagenic Potency        |                                                           |
|------------------|------------|-----------|------------|-----------|------------------------|-----------------------|--------------------------|-----------------------------------------------------------|
|                  | VOC (ppmC) | NO (ppbv) | VOC (ppmC) | NO (ppbv) | NO <sub>2</sub> (ppbv) | O <sub>3</sub> (ppbv) | rev h <sup>-1</sup> ± SE | rev m <sup>3</sup> mgC <sup>-1</sup> h <sup>-1</sup> ± SE |
| ethylbenzene-3.5 | 4.02       | 227       | 3.21       | 9         | 118                    | 47                    | 3.5 ± 0.8                | 9.2 ± 2.1                                                 |
| ethylbenzene-5   | 3.63       | 200       | 2.51       | 12        | 123                    | 41                    | 2.2 ± 0.3                | 4.1 ± 0.6                                                 |
| ethylbenzene-7   | 3.64       | 193       | 2.08       | 3         | 96                     | 96                    | 1.8 ± 0.6                | 2.4 ± 0.8                                                 |
| ethylbenzene-9   | 3.76       | 189       | 2.00       | 1         | 77                     | 142                   | 2.3 ± 0.5                | 2.8 ± 0.6                                                 |

**Table S6. Mutagenicity in *Salmonella* TA100-S9 with Lights On for Ethylbenzene Residence Time Experiments**

| Residence time (h) | Exposure (h)              | rev plate <sup>-1 a</sup> |                      |
|--------------------|---------------------------|---------------------------|----------------------|
|                    |                           | Exp 1                     | Exp 2                |
| 3.5                | 0                         | 96, 88, 91                | 124, 153, 112        |
|                    | 1                         | 142, 143                  | 127, 144             |
|                    | 2                         | 136, 144                  | 138, 135             |
|                    | 4                         | 158, 141                  | 119, 125             |
|                    | 8                         | 133, 161                  | 123, 153             |
|                    | 16                        | 178, 181                  | 100, 95 <sup>c</sup> |
|                    | sodium azide <sup>b</sup> |                           | 1234, 1179           |
| 5                  | 0                         | 104, 116, 103             | 106, 111, 104        |
|                    | 1                         | 106, 101                  | 110, 106             |
|                    | 2                         | 128, 112                  | 100, 102             |
|                    | 4                         | 92, 121                   | 98, 115              |
|                    | 8                         | 119, 109                  | 115, 126             |
|                    | 16                        | 151, 141                  | 153, 127             |
|                    | sodium azide <sup>b</sup> |                           | 857, 907             |
| 7                  | 0                         | 98, 103, 105              | 156, 126, 128        |
|                    | 1                         | 128, 112                  | 134, 116             |
|                    | 2                         | 133, 131                  | 121, 131             |
|                    | 4                         | 117, 150                  | 131, 122             |
|                    | 8                         | 139, 127                  | 130, 146             |
|                    | 16                        | 176, 174                  | 131, 117             |
|                    | sodium azide <sup>b</sup> |                           | 1154, 1131           |
| 9                  | 0                         | 139, 127, 102             | 119, 122, 134        |
|                    | 1                         | 147, 116                  | 140, 123             |
|                    | 2                         | 123, 111                  | 114, 133             |
|                    | 4                         | 133, 130                  | 119, 116             |
|                    | 8                         | 151, 117                  | 117, 131             |
|                    | 16                        | 154, 144                  | 156, 198             |
|                    | sodium azide <sup>b</sup> |                           | 1180, 1106           |

<sup>a</sup>Three plates were used for DMSO (0 h) controls, and two plates were used for all other exposures.

<sup>b</sup>Positive control at 3 µg/plate.

<sup>c</sup>Data not used in the linear regression because the R<sup>2</sup> value was reduced by inclusion of those data.



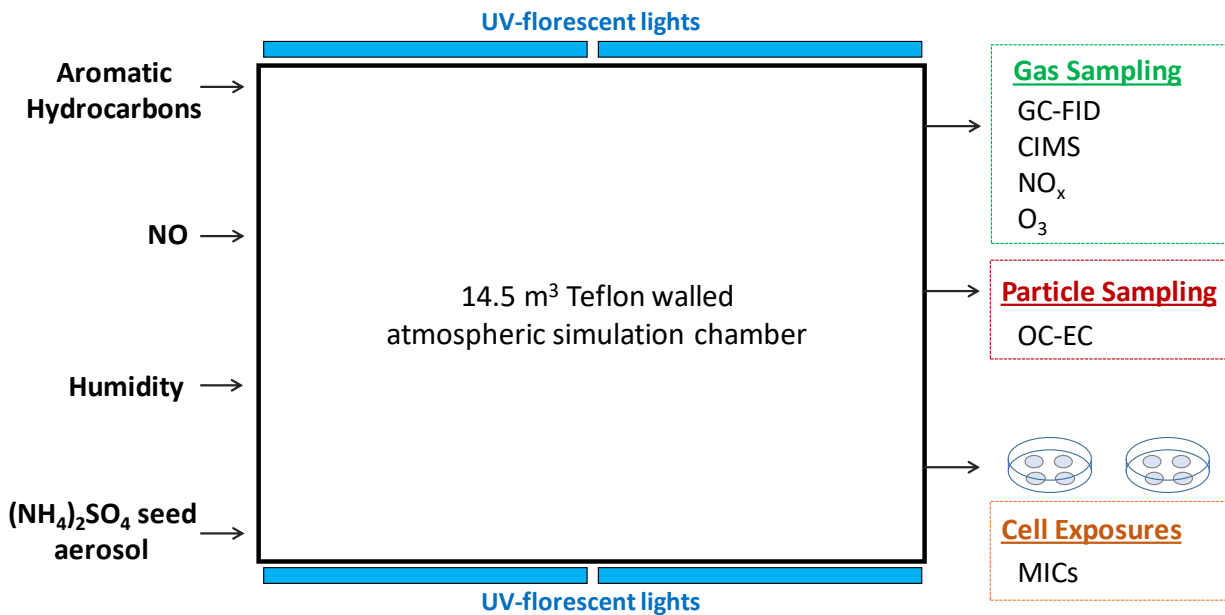

**Figure S1.** Simplified schematic of atmospheric simulation chamber and experiment setup.

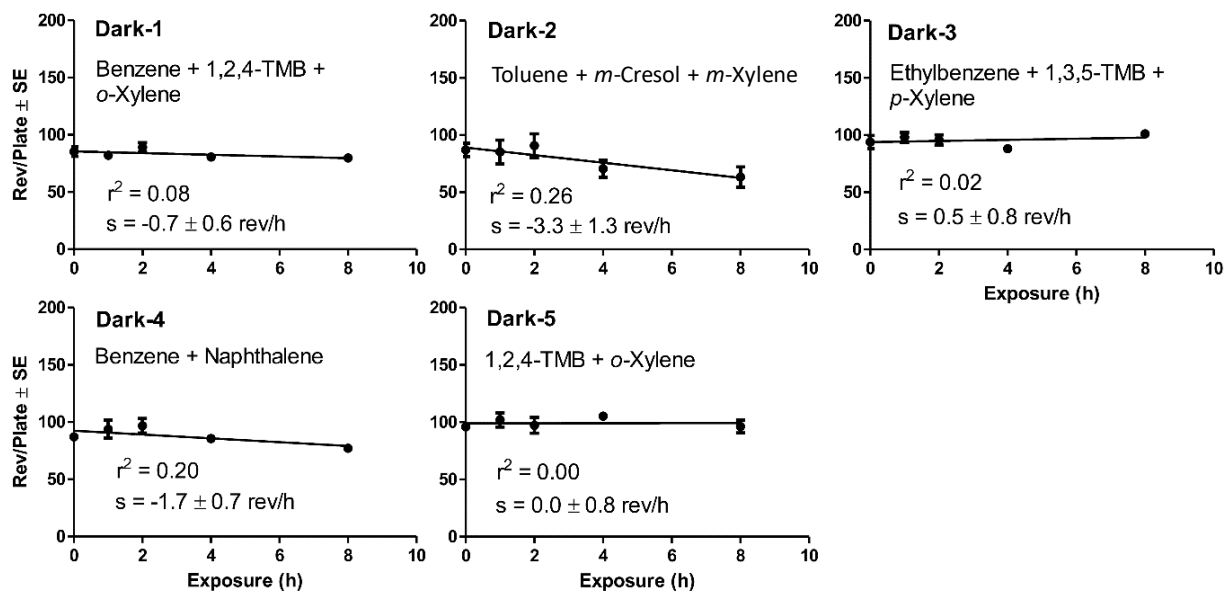

**Figure S2.** Plots of revertants plate<sup>-1</sup> versus exposure time for the dark-exposure experiments.

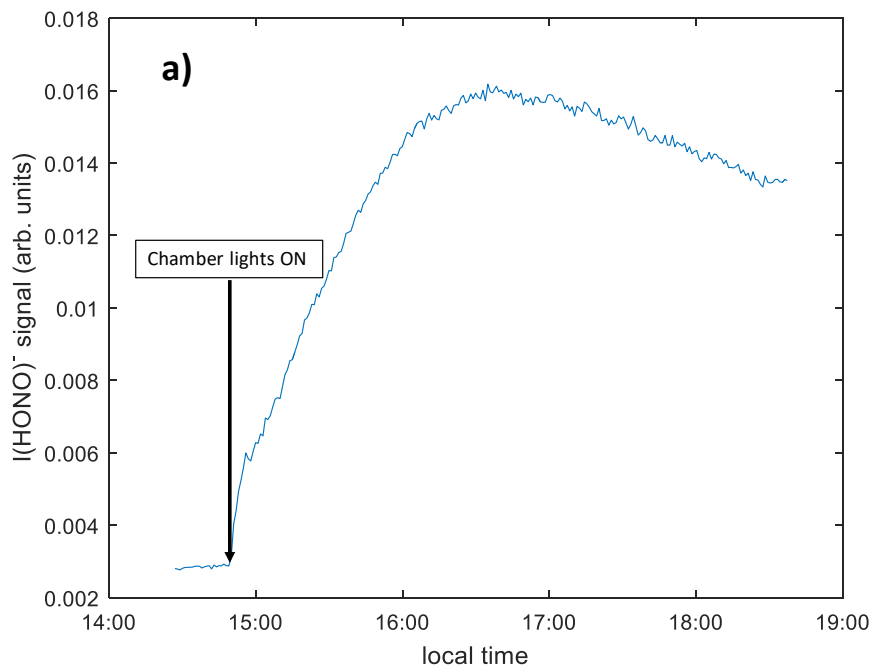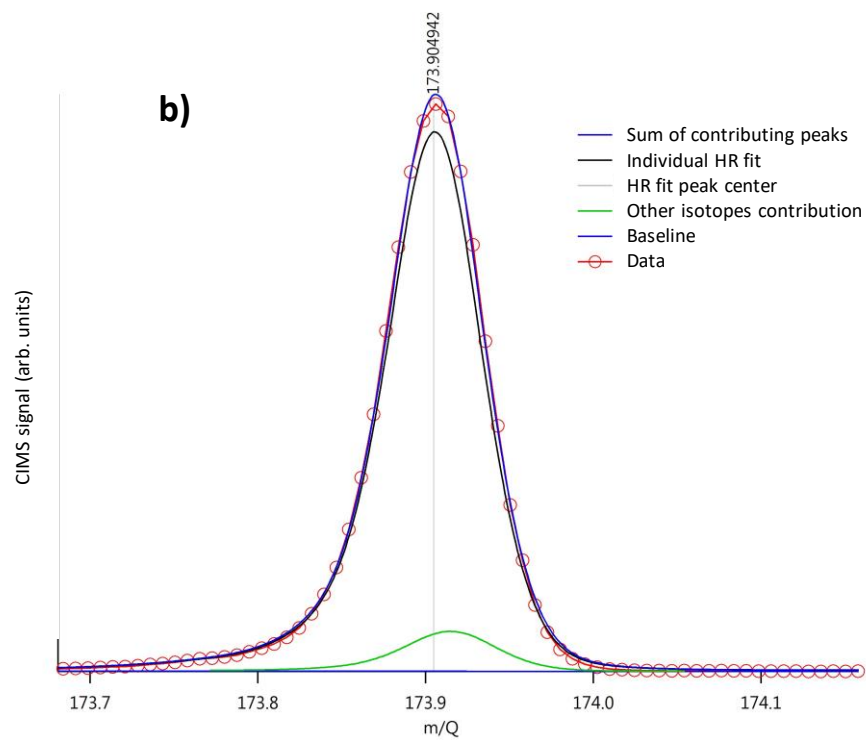

**Figure S3.** (a) Representative CIMS  $I(\text{HONO})^-$  time series during the transition from chamber lights off to lights on. (b) The associated high-resolution (HR) mass spectra peak fit and center for the  $I(\text{HONO})^-$  peak assignment.

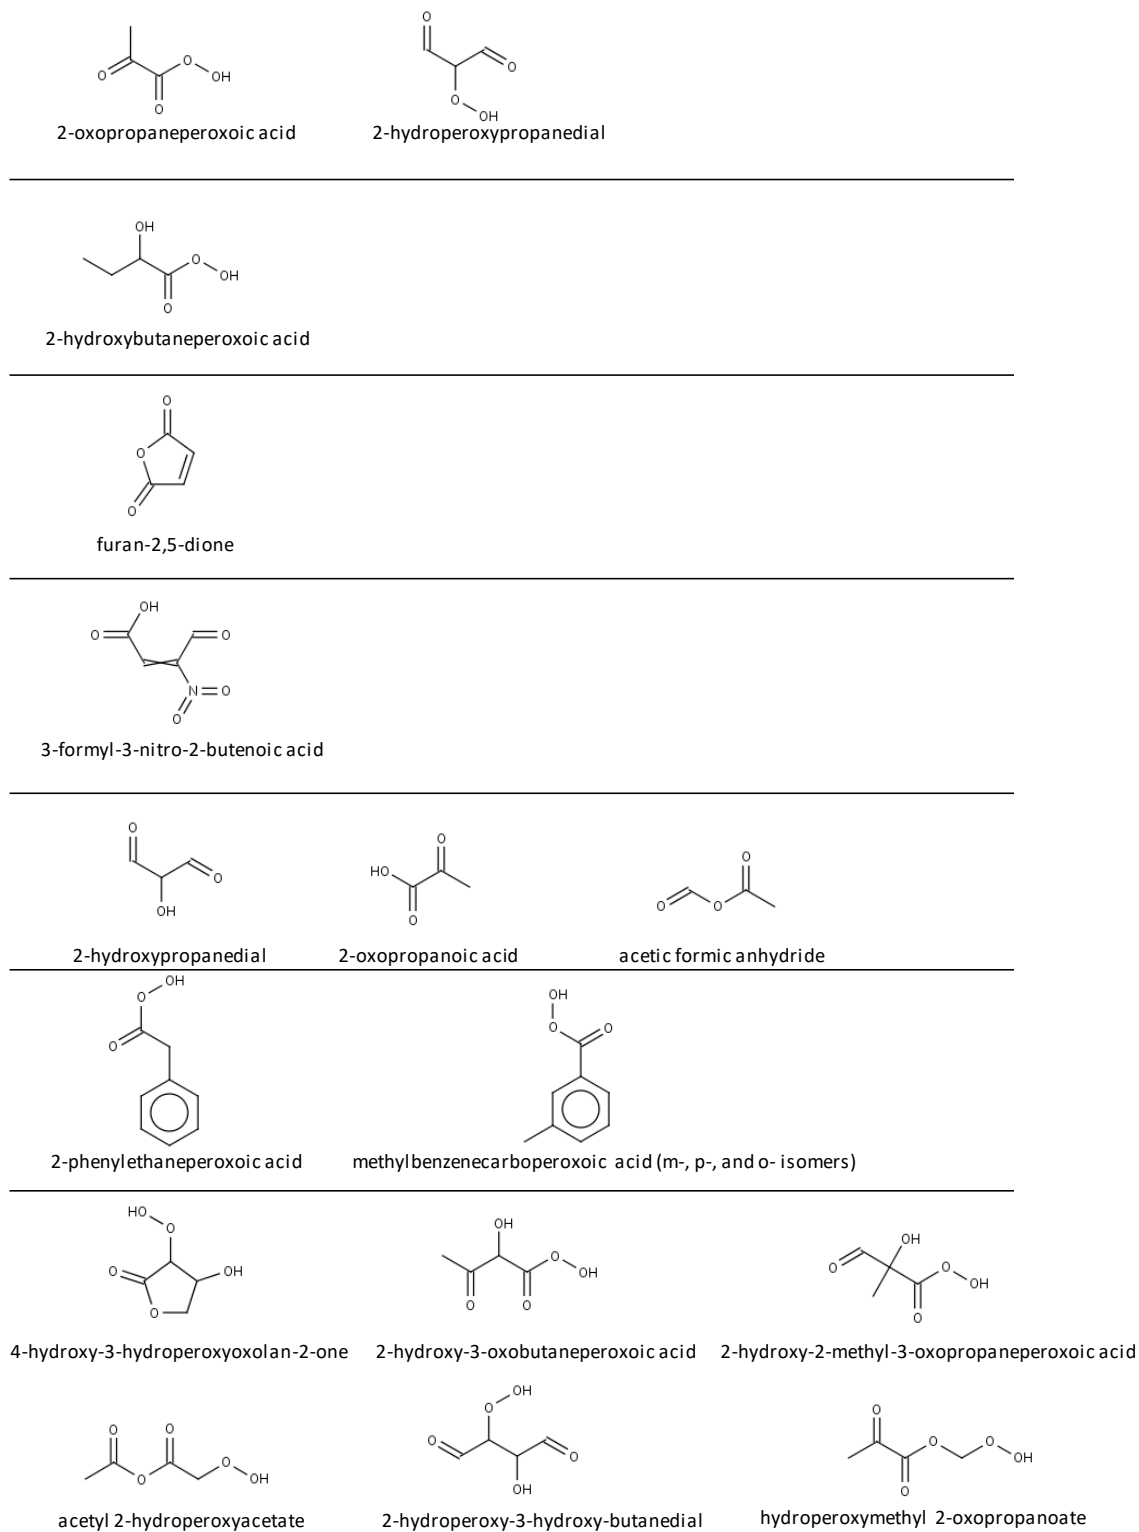

**Figure S4.** Chemical structures for the potential organic compounds provided in Table 2 of the main text.

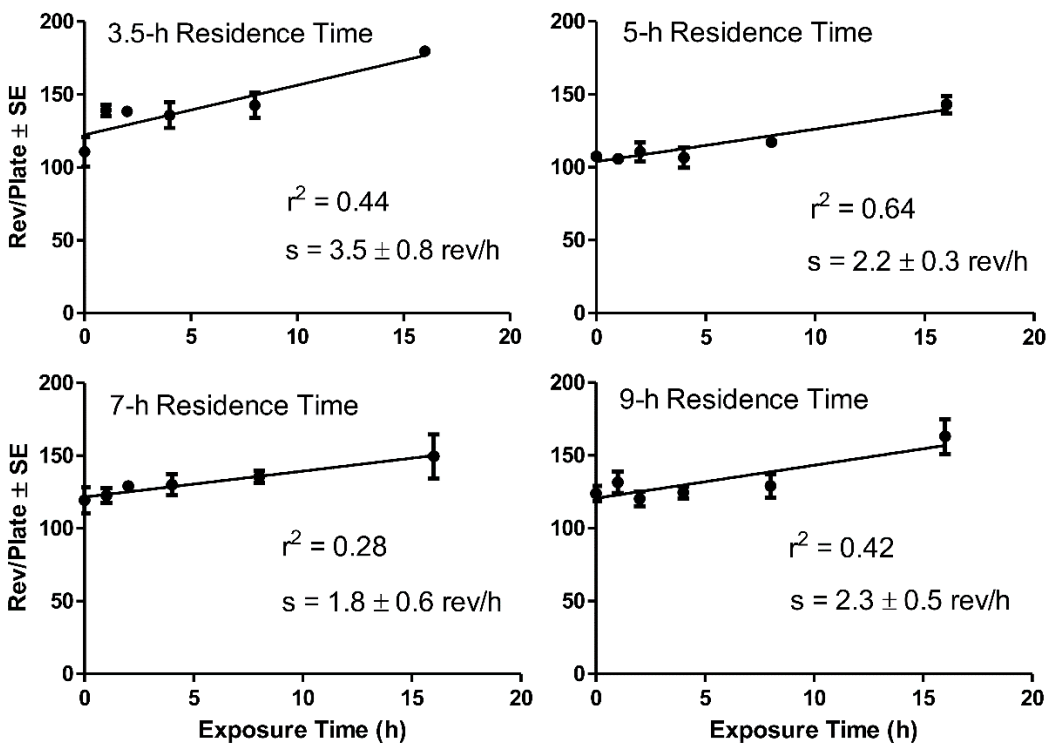

**Figure S5.** Plots of revertants plate<sup>-1</sup> versus exposure time for the ethylbenzene variable residence time experiments.

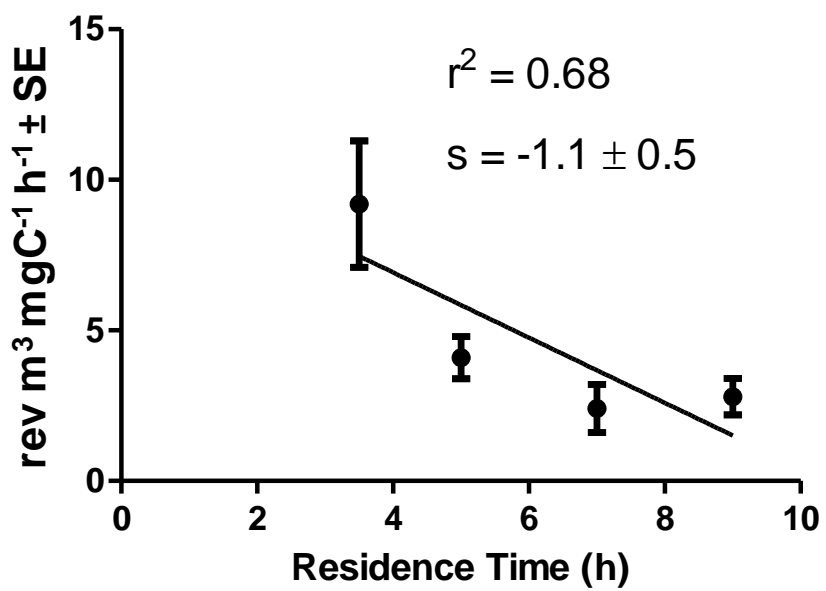

**Figure S6.** Relationship between residence time and mutagenic potency for the ethylbenzene variable residence time experiments; “s” is the slope.

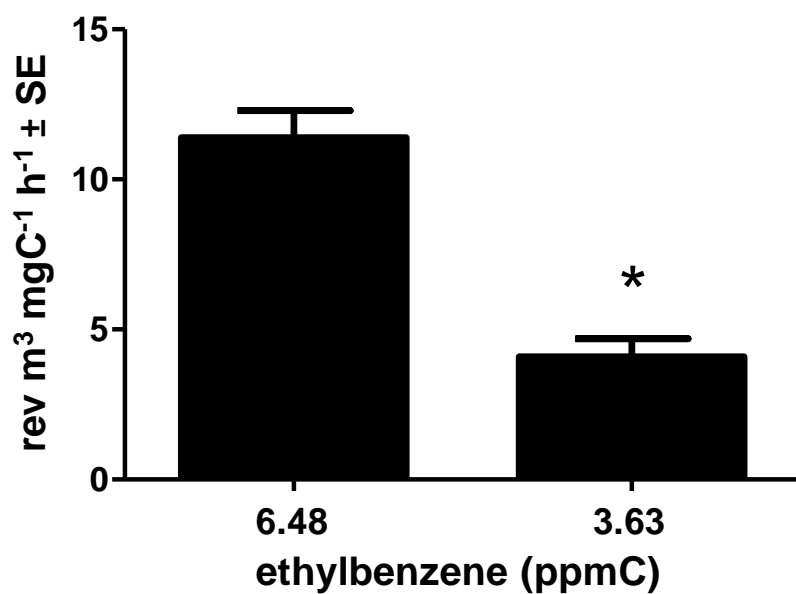

**Figure S7.** Significant difference ( $P < 0.05$ ) in mutagenic potencies for initial ethylbenzene mixing ratios of 6.48 ppmC with 266 ppbv NO (4.5-h residence time) and 3.63 ppmC with 200 ppbv NO (5-h residence time).
